# Supplementary material for: Mesenchymal expression of activated K-ras yields Noonan Syndrome-like bone defects that are rescued by mid-gestational MEK inhibition
Source: bioRxiv or medRxiv preprint supplement (doi:10.1101/634840), 2019-05-10

## Supplemental Figure Legends

**Supplemental Figure 1. *Col2-Cre;K-ras<sup>G12D</sup>* mice display similar bone defects to *Prx1-Cre;K-ras<sup>G12D</sup>* mutant animals.** (A) H&E sections and (B) Alizarin Red staining of representative long bones from control versus *Col2-Cre;K-ras<sup>G12D</sup>* mice at P1.

**Supplemental Figure 2. Long bone defects in E16.5 *Prx1-Cre; K-ras<sup>G12D</sup>* mutant embryos.** H&E sections of representative humeri of control and *Prx1-Cre;K-ras<sup>G12D</sup>* mice.

**Supplemental Figure 3. Vehicle injections during embryonic development does not affect the bone phenotypes in *Prx1-Cre;K-ras<sup>G12D</sup>* mutants.** Histological analysis of representative long bones from E18.5 control (CTL) and *Prx1-Cre;K-ras<sup>G12D</sup>* mutant littermate embryos after vehicle injections during the indicated time windows indicates no effect on the phenotype.

**Supplementary Figure 1**

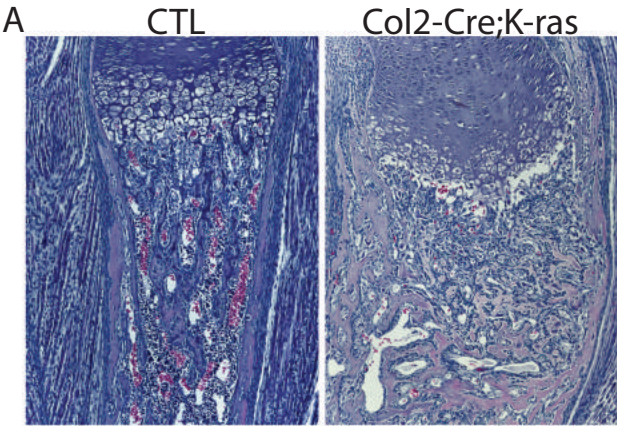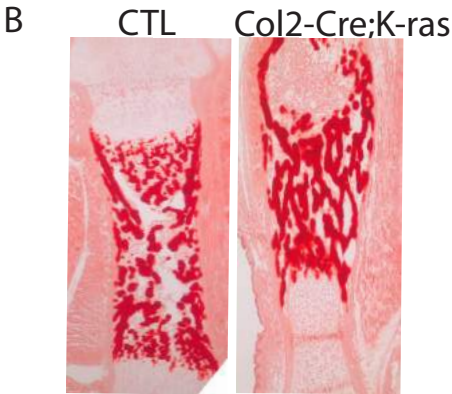

**Supplementary Figure 2**

CTL

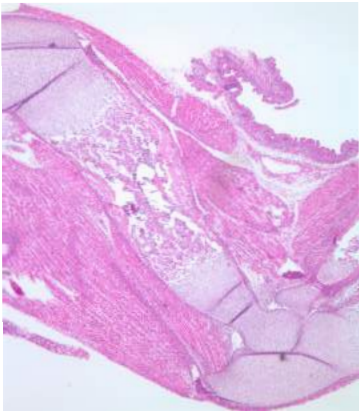

K-ras

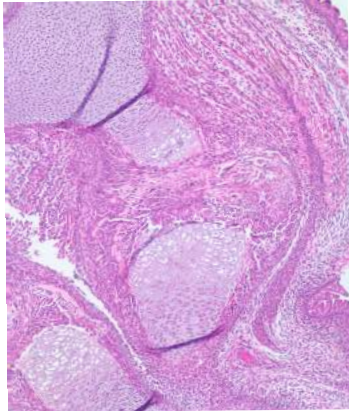

Supplementary Figure 3

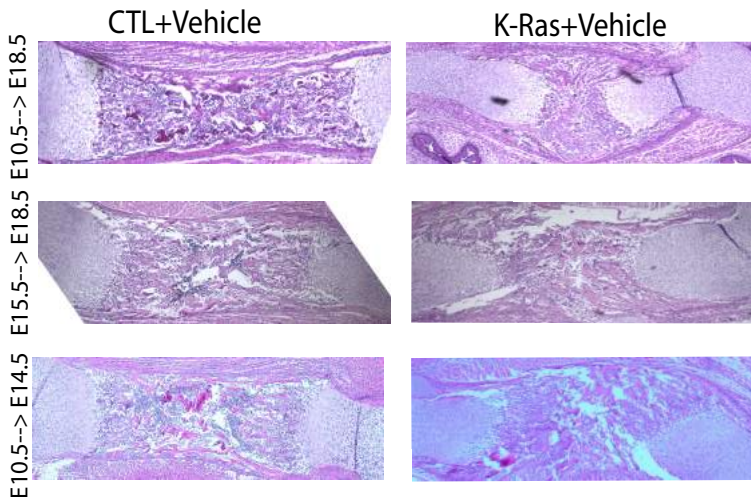

Supplement: Supplementary file [file media-1.pdf]
